# Supplementary material for: Thousands of Rab GTPases for the Cell Biologist
Source: PLOS journal article supplement (doi:10.1371/journal.pcbi.1002217), 2011-10-13
Supplement: S3 (10.1371/journal.pcbi.1002217.s003) [file journal.pcbi.1002217.s003]

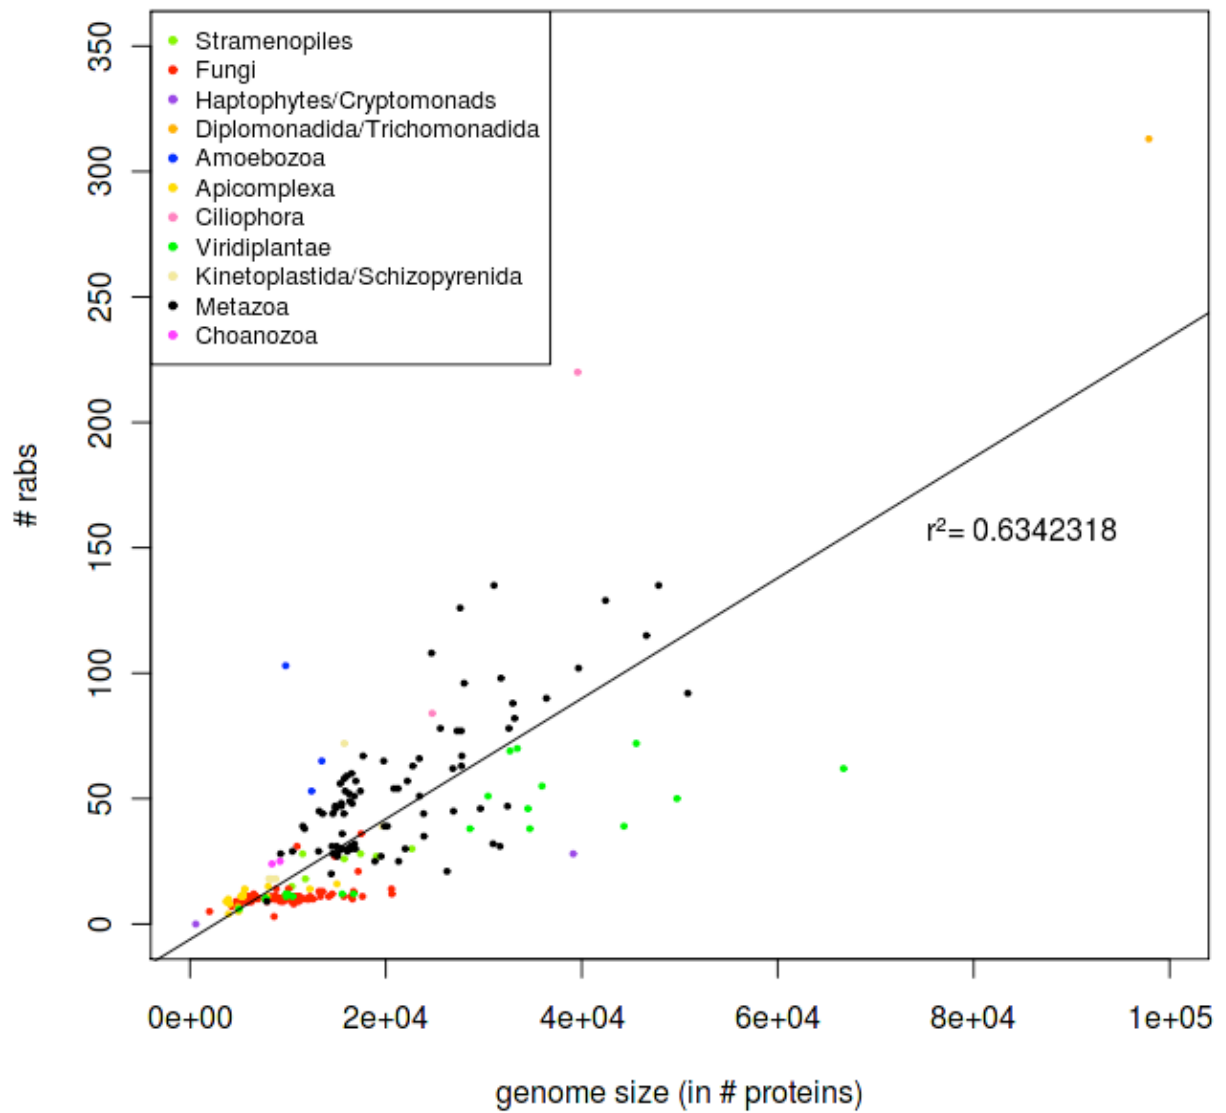

**Figure S2. Linear regression of number of Rabs against genome size.** Data consists of the 247 genomes profiled by the Rabifier. The taxa are shown in different colours.
