# Supplementary material for: Thousands of Rab GTPases for the Cell Biologist
Source: PLOS journal article supplement (doi:10.1371/journal.pcbi.1002217), 2011-10-13
Supplement: S4 (10.1371/journal.pcbi.1002217.s004) [file journal.pcbi.1002217.s004]

the main article. All sequence accessions are listed in **Table S2**. The representation has been generated with Dendroscope [1].

## References

1. Huson DH, Richter DC, Rausch C, DeZulian T, Franz M et al. (2007) Dendroscope: An interactive viewer for large phylogenetic trees. *BMC Bioinformatics* 8: 460.
